# Supplementary material for: Metal citrate nanoparticles: a robust water-soluble plant micronutrient source
Source: Royal Society of Chemistry journal article supplement (doi:10.1039/d1ra02907j), 2021-01-01
Supplement: d1ra02907j1.pdf [file d1ra02907j1.pdf]

### Supporting Information for

#### Metal citrate nanoparticles: A robust water soluble plant micronutrient source

K.S.V. Poorna Chandrika<sup>a,b</sup>, Dinabandhu Patra<sup>a</sup>, Praduman Yadav<sup>b</sup>, Md. A. Aziz Qureshi<sup>b</sup>, and Balaji Gopalan<sup>a\*</sup>

<sup>b</sup>Crop Production Section, ICAR-Indian Institute of Oilseeds Research, Rajendranagar, Hyderabad, Telangana 500030, India.

<sup>a</sup>Department of Chemistry, Birla Institute of Technology and Science (BITS) Pilani, Hyderabad Campus, Jawahar Nagar, Kapra Mandal, Hyderabad, 500078, India.

□Corresponding author: E-mail addresses: [gbalaji@hyderabad.bits-pilani.ac.in](mailto:gbalaji@hyderabad.bits-pilani.ac.in)

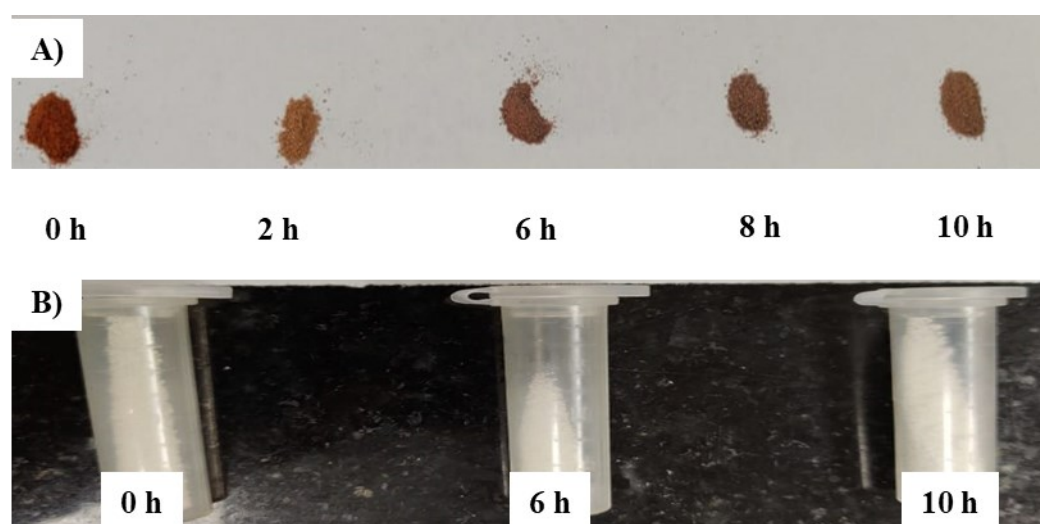

**Fig. S1:** Different durations of ball milled samples of A) ferric citrate and B) zinc citrate

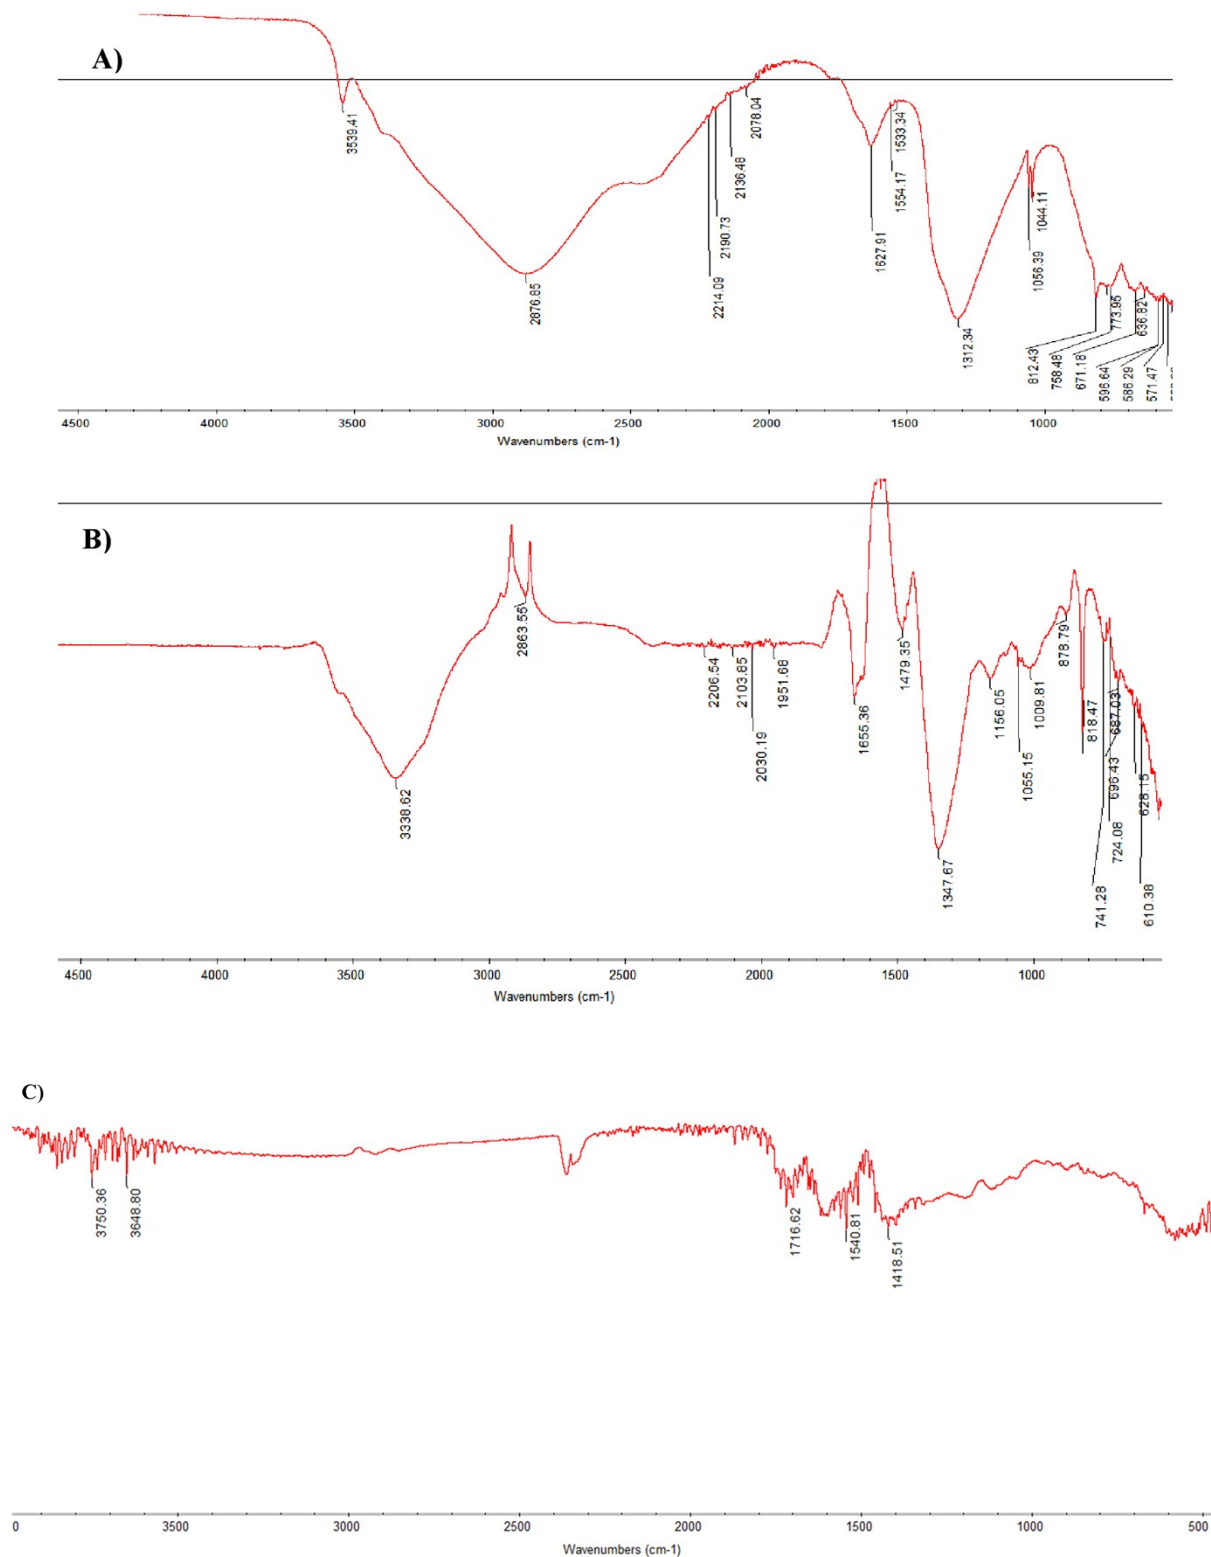

**Fig S2:** FTIR spectra of A) Ferric nitrate B) Zinc nitrate and C) FC-0 washed with solvent

A)

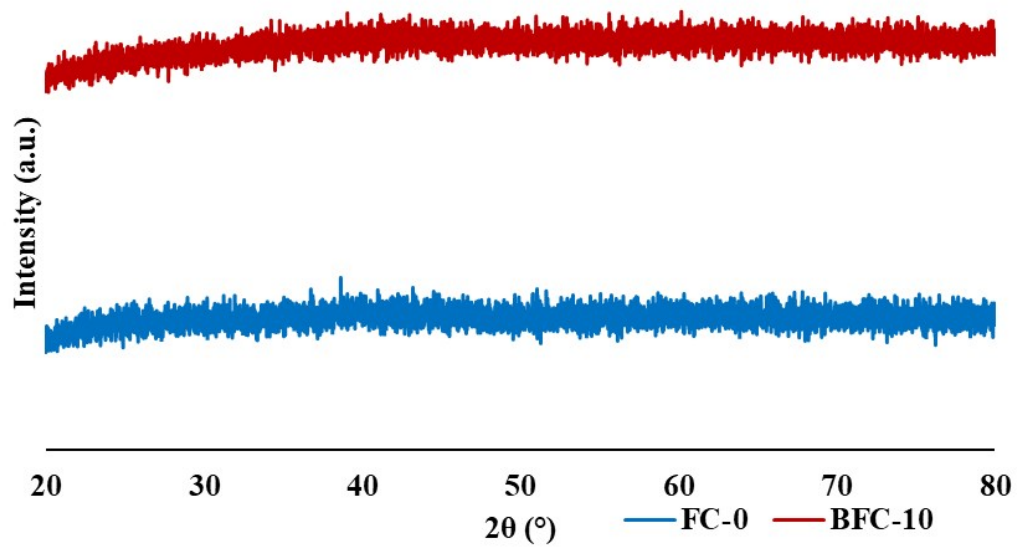

B)

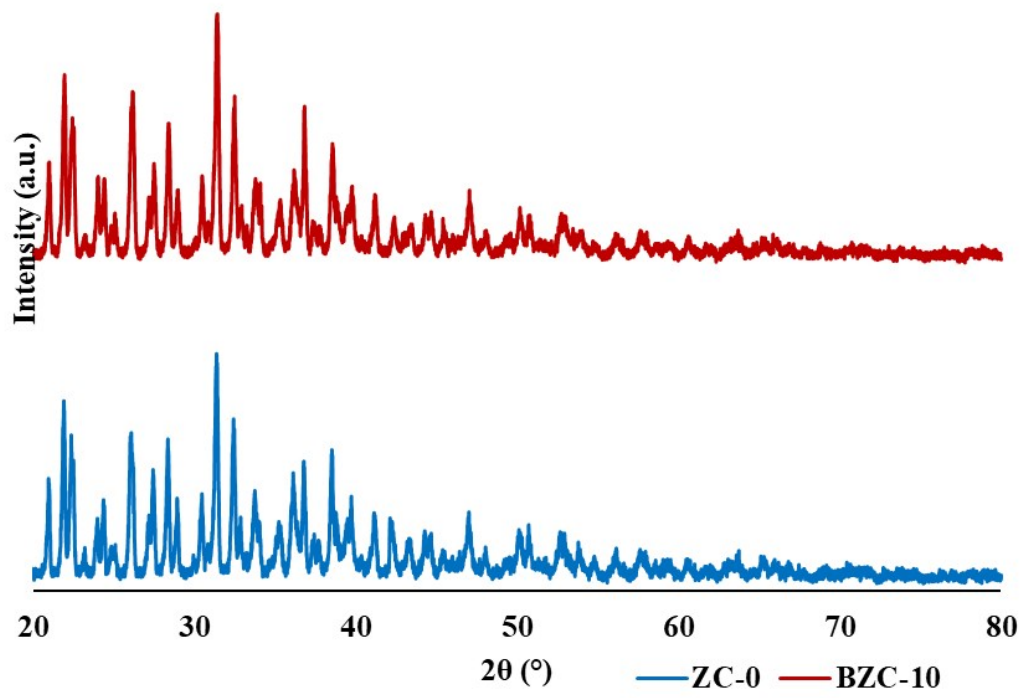

C)

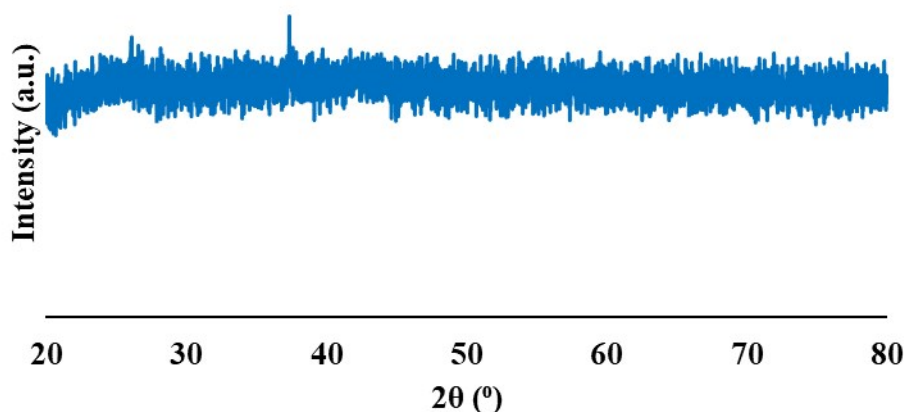

**Fig S3:** XRD of A) Ferric citrates (FC-0 and BFC-10) B) Zinc citrates (ZC-0 and BZC-10) and C) FC-0 washed with solvent\*

\*Sample washed with the solvent did not show much change in XRD

**Table S1:** Estimation of nitrate through Devarda's distillation and citric acid through titration method in citrates

| Treatment                       | Citric acid (l) | % NO <sub>3</sub> |
|---------------------------------|-----------------|-------------------|
| FC-0 (1:1)                      | 5.4 ml T.V.     | 0.04389           |
| ZC-0 (1:3)                      | 8.6 ml T.V.     | 0.00196           |
| FC-0 (1:3)                      | 15.5 ml T.V.    | 0.0028            |
| ZC-0 (1:1)                      | 1.7 ml T.V.     | 0.071             |
| FC-0 (1:1) washed with solvent* | 2.1 ml T.V.     | 0.032             |

\*Sample washed with the solvent did not show much change in nitrate

**Table S2:** Plant uptake studies with ferric citrates in soybean (var. JS-335)

| Treatment                                               | Nutrient concentration of Fe<br>μg/ g of dry weight | Plant uptake of Fe<br>μg/ g of dry weight |
|---------------------------------------------------------|-----------------------------------------------------|-------------------------------------------|
| Control                                                 | 100                                                 | -                                         |
| Ferric nitrate nonahydrate                              | 165.8                                               | 65.8                                      |
| Zinc nitrate hexahydrate                                | 181.1                                               | 81.1                                      |
| FC 1:3 0 h                                              | 364.4                                               | 264.4                                     |
| FC 1:1 with added 2 moles<br>equivalent citric acid 0 h | 410.7                                               | 310.7                                     |

|                                           |       |       |
|-------------------------------------------|-------|-------|
| <b>Commercial available FC<br/>0hours</b> | 358.1 | 258.1 |
| <b>FC-0 (1:1) washed with<br/>solvent</b> | 287   | 187   |

\*Sample washed with the solvent did not show much difference in nutrient uptake

**Table S3:** Plant uptake studies with various types of nanoparticles in soybean of previous literature

| S.No | Nutrient form                                          | Concentration of nutrient studied                                     | No. of days exposed                          | Uptake by plant (Zn/Fe)                                                               |
|------|--------------------------------------------------------|-----------------------------------------------------------------------|----------------------------------------------|---------------------------------------------------------------------------------------|
| 1)   | ZnO NPs <sup>S1</sup>                                  | 500 mg/ L<br>1000, 2000,<br>and 4000 mg<br>/L<br>Control (0 mg<br>/L) | 65% of<br>control roots<br>were 5 mm<br>long | 229 mg Zn<br>/kg<br>Dry Weight<br>135 to 150<br>mg Zn /kg<br>DW<br>40 mg Zn<br>/kg DW |
| 2)   | ZnO NPs <sup>S2</sup>                                  | Control<br>5 g/ kg<br>10 g/ kg<br>50 g/ kg                            | 48 days                                      | 188.4 mg/<br>kg<br>252.74 mg/<br>kg DW<br>340 mg/ kg<br>DW<br>710.02 mg<br>/kg DW     |
| 3)   | ZnO NPs <sup>S3</sup>                                  | Control<br>50 mg/ kg<br>500 mg/ kg                                    | 65 days                                      | 201 mg/ kg<br>DW<br>1568 mg/ kg<br>DW<br>9463 mg/ kg<br>DW                            |
| 4)   | Iron-Humic<br>Nanofertilizers<br>FeEDDHA <sup>S4</sup> | 35-150 $\mu$ mol/<br>pot<br>50 $\mu$ mol/ pot                         | 48 days                                      | 32.6 to 57.8<br>mg/ kg DW<br>46.7 mg/ kg<br>DW                                        |
| 5)   | Fe chelates <sup>S5</sup>                              | Control<br>5 $\mu$ M                                                  | 60 days                                      | 0.55 $\mu$ mol<br>0.36 to 0.68<br>$\mu$ mol in fruit                                  |

#### Supplementary References:

S1. M.L. López-Moreno, G. De La Rosa, J.A. Hernández-Viezcas, H. Castillo-Michel, C.E. Botez, J.R. Peralta-Videa and J.L. Gardea-Torresdey, J.L, *Environmental Science and Technology*, 2010, **44**, 7315–7320.

- S2. J.H. Priester, Y. Ge, R. Mielke, A.M. Horst, S. Cole Moritz, K. Espinosa, J. Gelb, S.L. Walker, R.M. Nisbet, Y.J. An, Y. J.; et al., *Proceedings of the National Academy of Sciences of the United States of America*, DOI:10.1073/pnas.1205431109.
- S3. S.J. Yoon, J.I. Kwak, W.M. Lee, P.A. Holden and Y.J. An, *Ecotoxicology and Environmental Safety*, 2014, **100**, 131–137.
- S4. T. Cieschi María, Y.A. Polyakov, V.A. Lebedev, S.D. Volkov, A.D. Pankratov, A.A. Veligzhanin, V.I. Perminova and J.J. Lucena, *Frontiers in Plant Science*, 2019, **10**, 413. DOI: 10.3389/fpls.2019.00413.
- S5. C. Martín-Fernández, S. López-Rayó, L. Hernández-Apaolaza and J.J. Lucena, *Journal of the Science of Food and Agriculture*, 2017, **97**, 2773–2781. doi: 10.1002/jsfa.8105.
